# Supplementary material
Source: publisher figshare collection journal article supplement (https://karger.figshare.com/articles/dataset/_/9751730)
Supplement: Supplementary file 1 [file 1]

Archive with 3 entries (3 files):
- 502634_sm1.pdf
- 502634_sm3.tif
- 502634_sm2.tif
