# Supplementary material
Source: publisher figshare collection journal article supplement (https://karger.figshare.com/articles/dataset/_/9751730)
Supplement: Supplementary file 1 [file 1 › 502634_sm1.pdf]

**Suppl figure 1.** Analysis excluding CKD stage 1 as a negative selection criterion. (A) Depicted are the percent increases of included patients when compared to the analysis in figure 1 A (total population n=131), (B) the delta of overlapping patients selected by different recommendations when compared to the analysis in figure 1 B, and (C) the change in percentage of patients selected according to the number of different treatment recommendations compared to figure 1 C. (D, E, F) show the corresponding data for the subpopulation with available MRI or CT scans (n=61) and (G, H, I) for the genotyped subpopulation (n=39).

**Suppl figure 2.** Treatment recommendations for individual patients according to the ERA-EDTA and U.S. systems when (A) excluding CKD stage by age as a negative selection parameter within the ERA-EDTA assessment and (B) including rapid decline in eGFR as a positive selection parameter in the U.S. system. Each patient with available (ht)TKV (n=61) is represented by a circle or diamond corresponding to selection by the U.S., ERA-EDTA, both or no systems
