# Supplementary material
Source: publisher figshare collection journal article supplement (https://karger.figshare.com/articles/dataset/_/9751730)

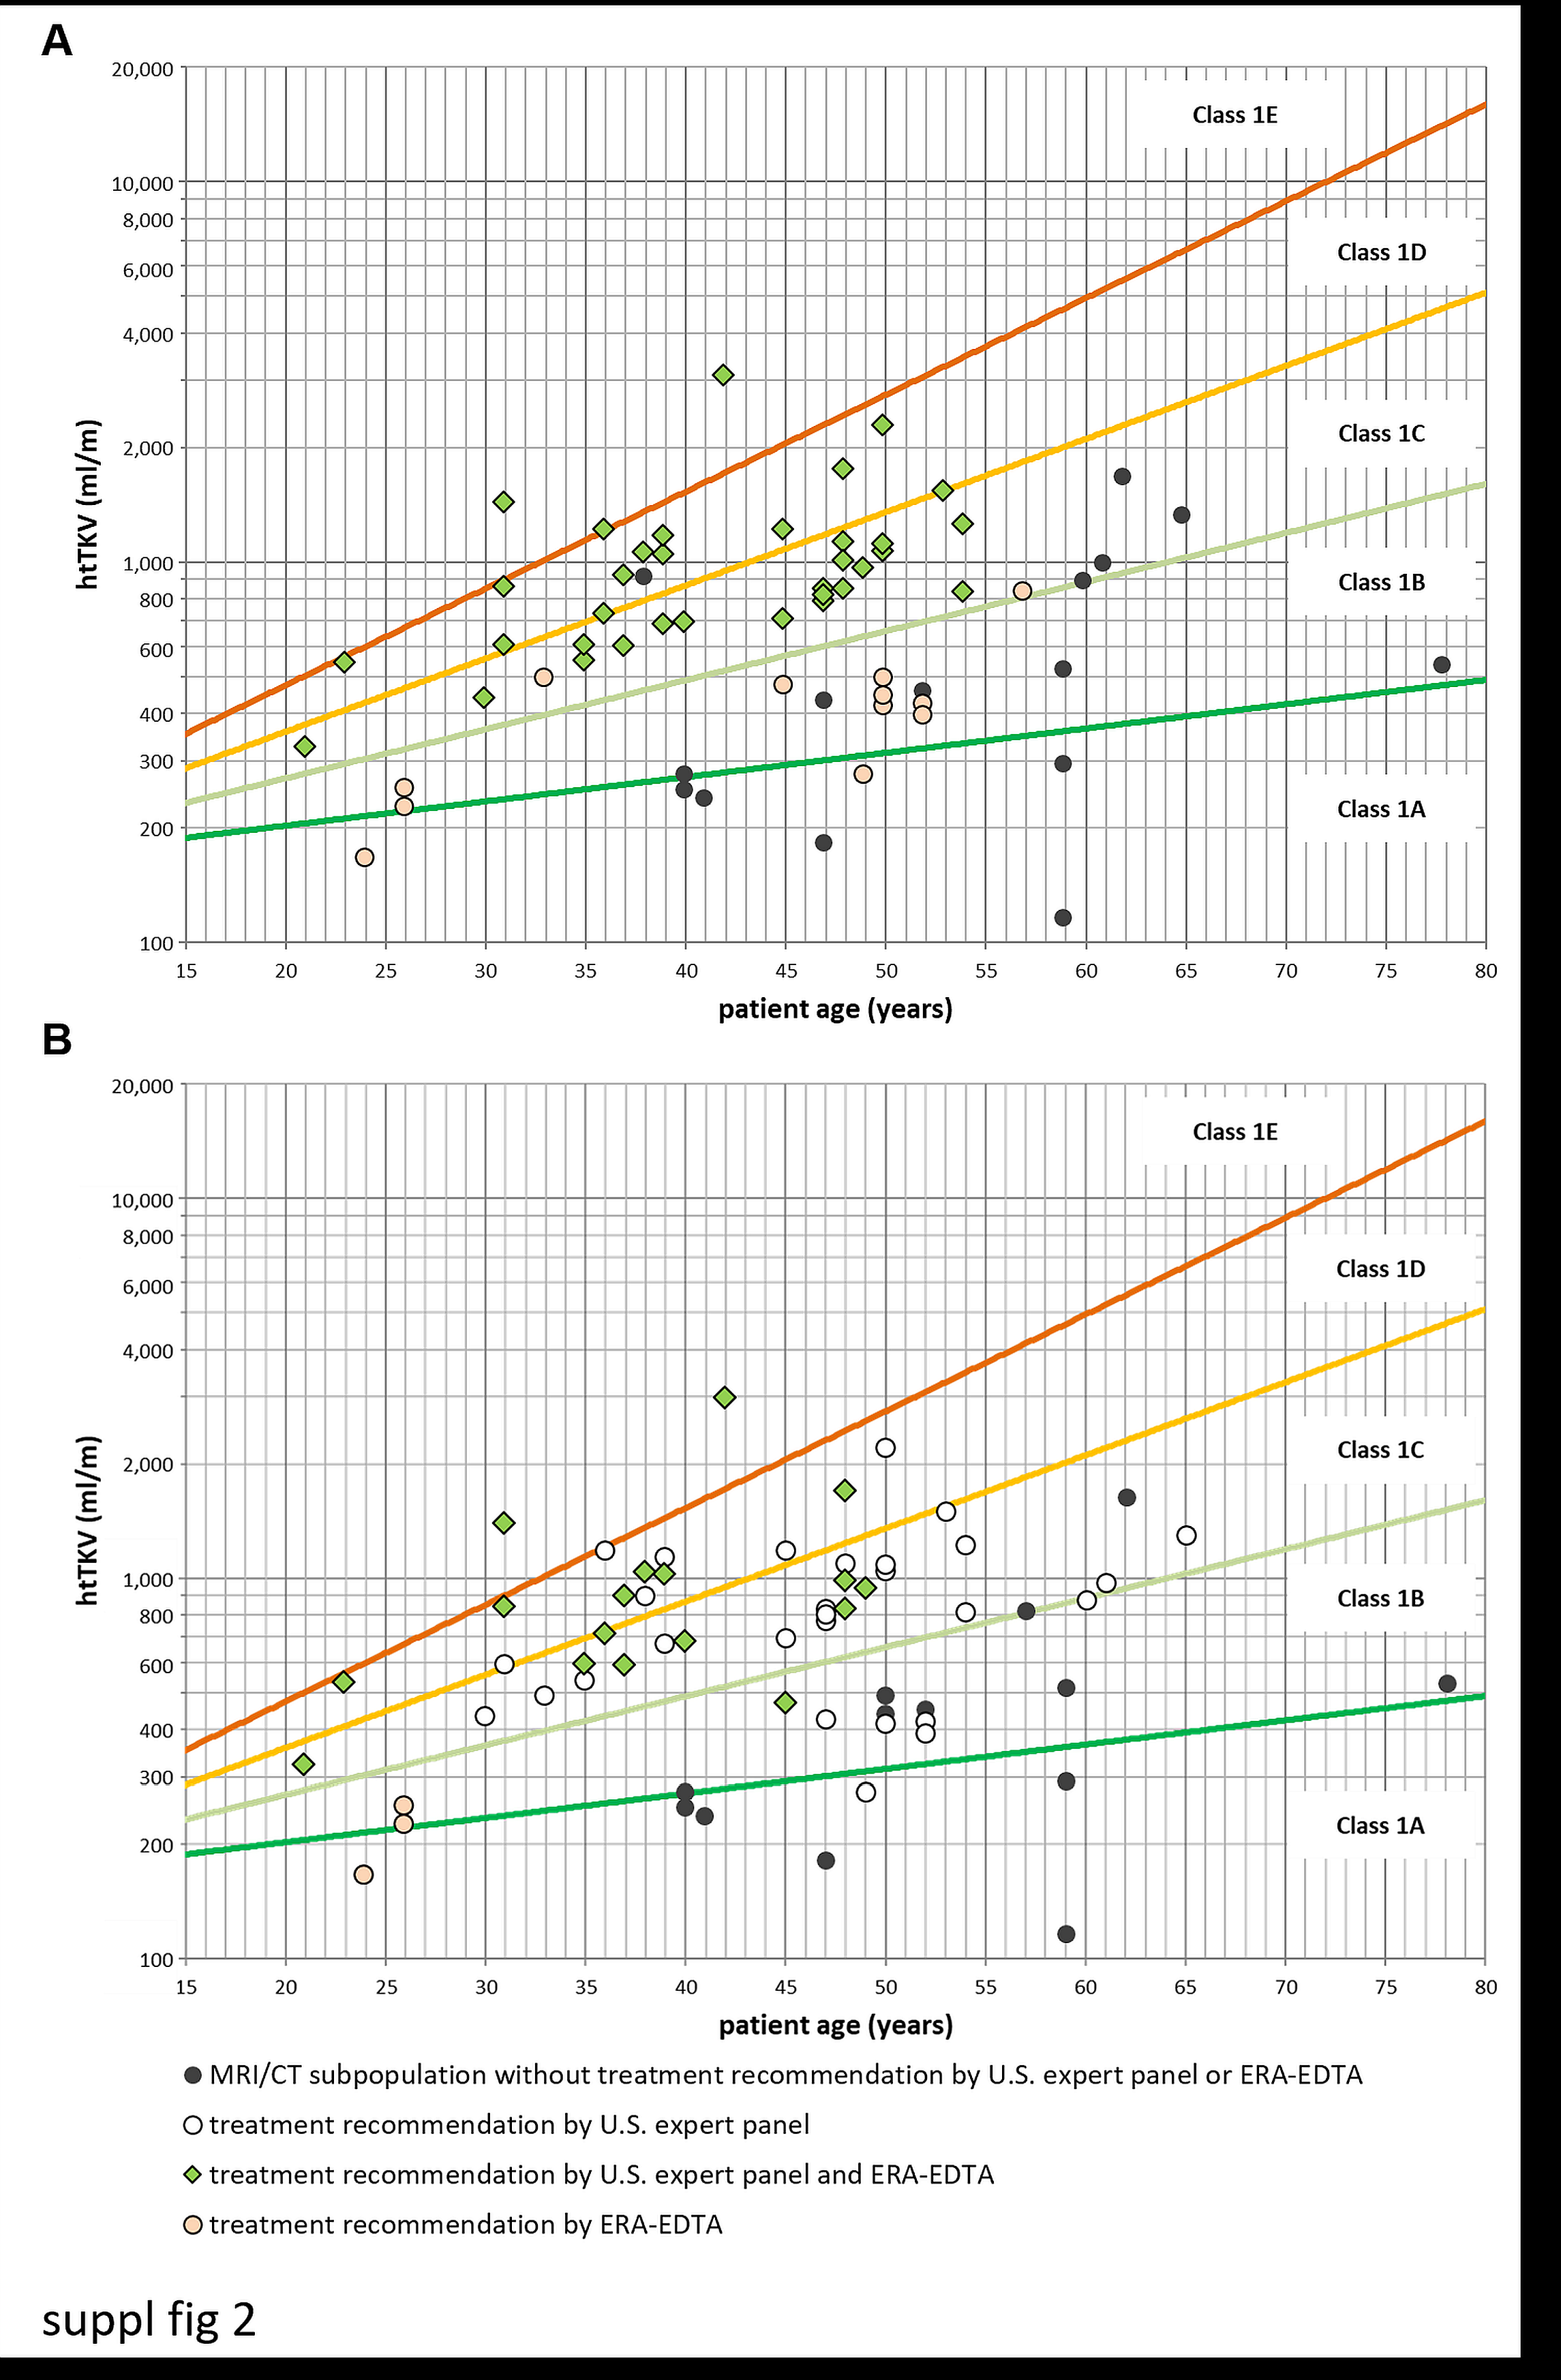

Supplement: Supplementary file 1 [file 1 › 502634_sm3.tif]

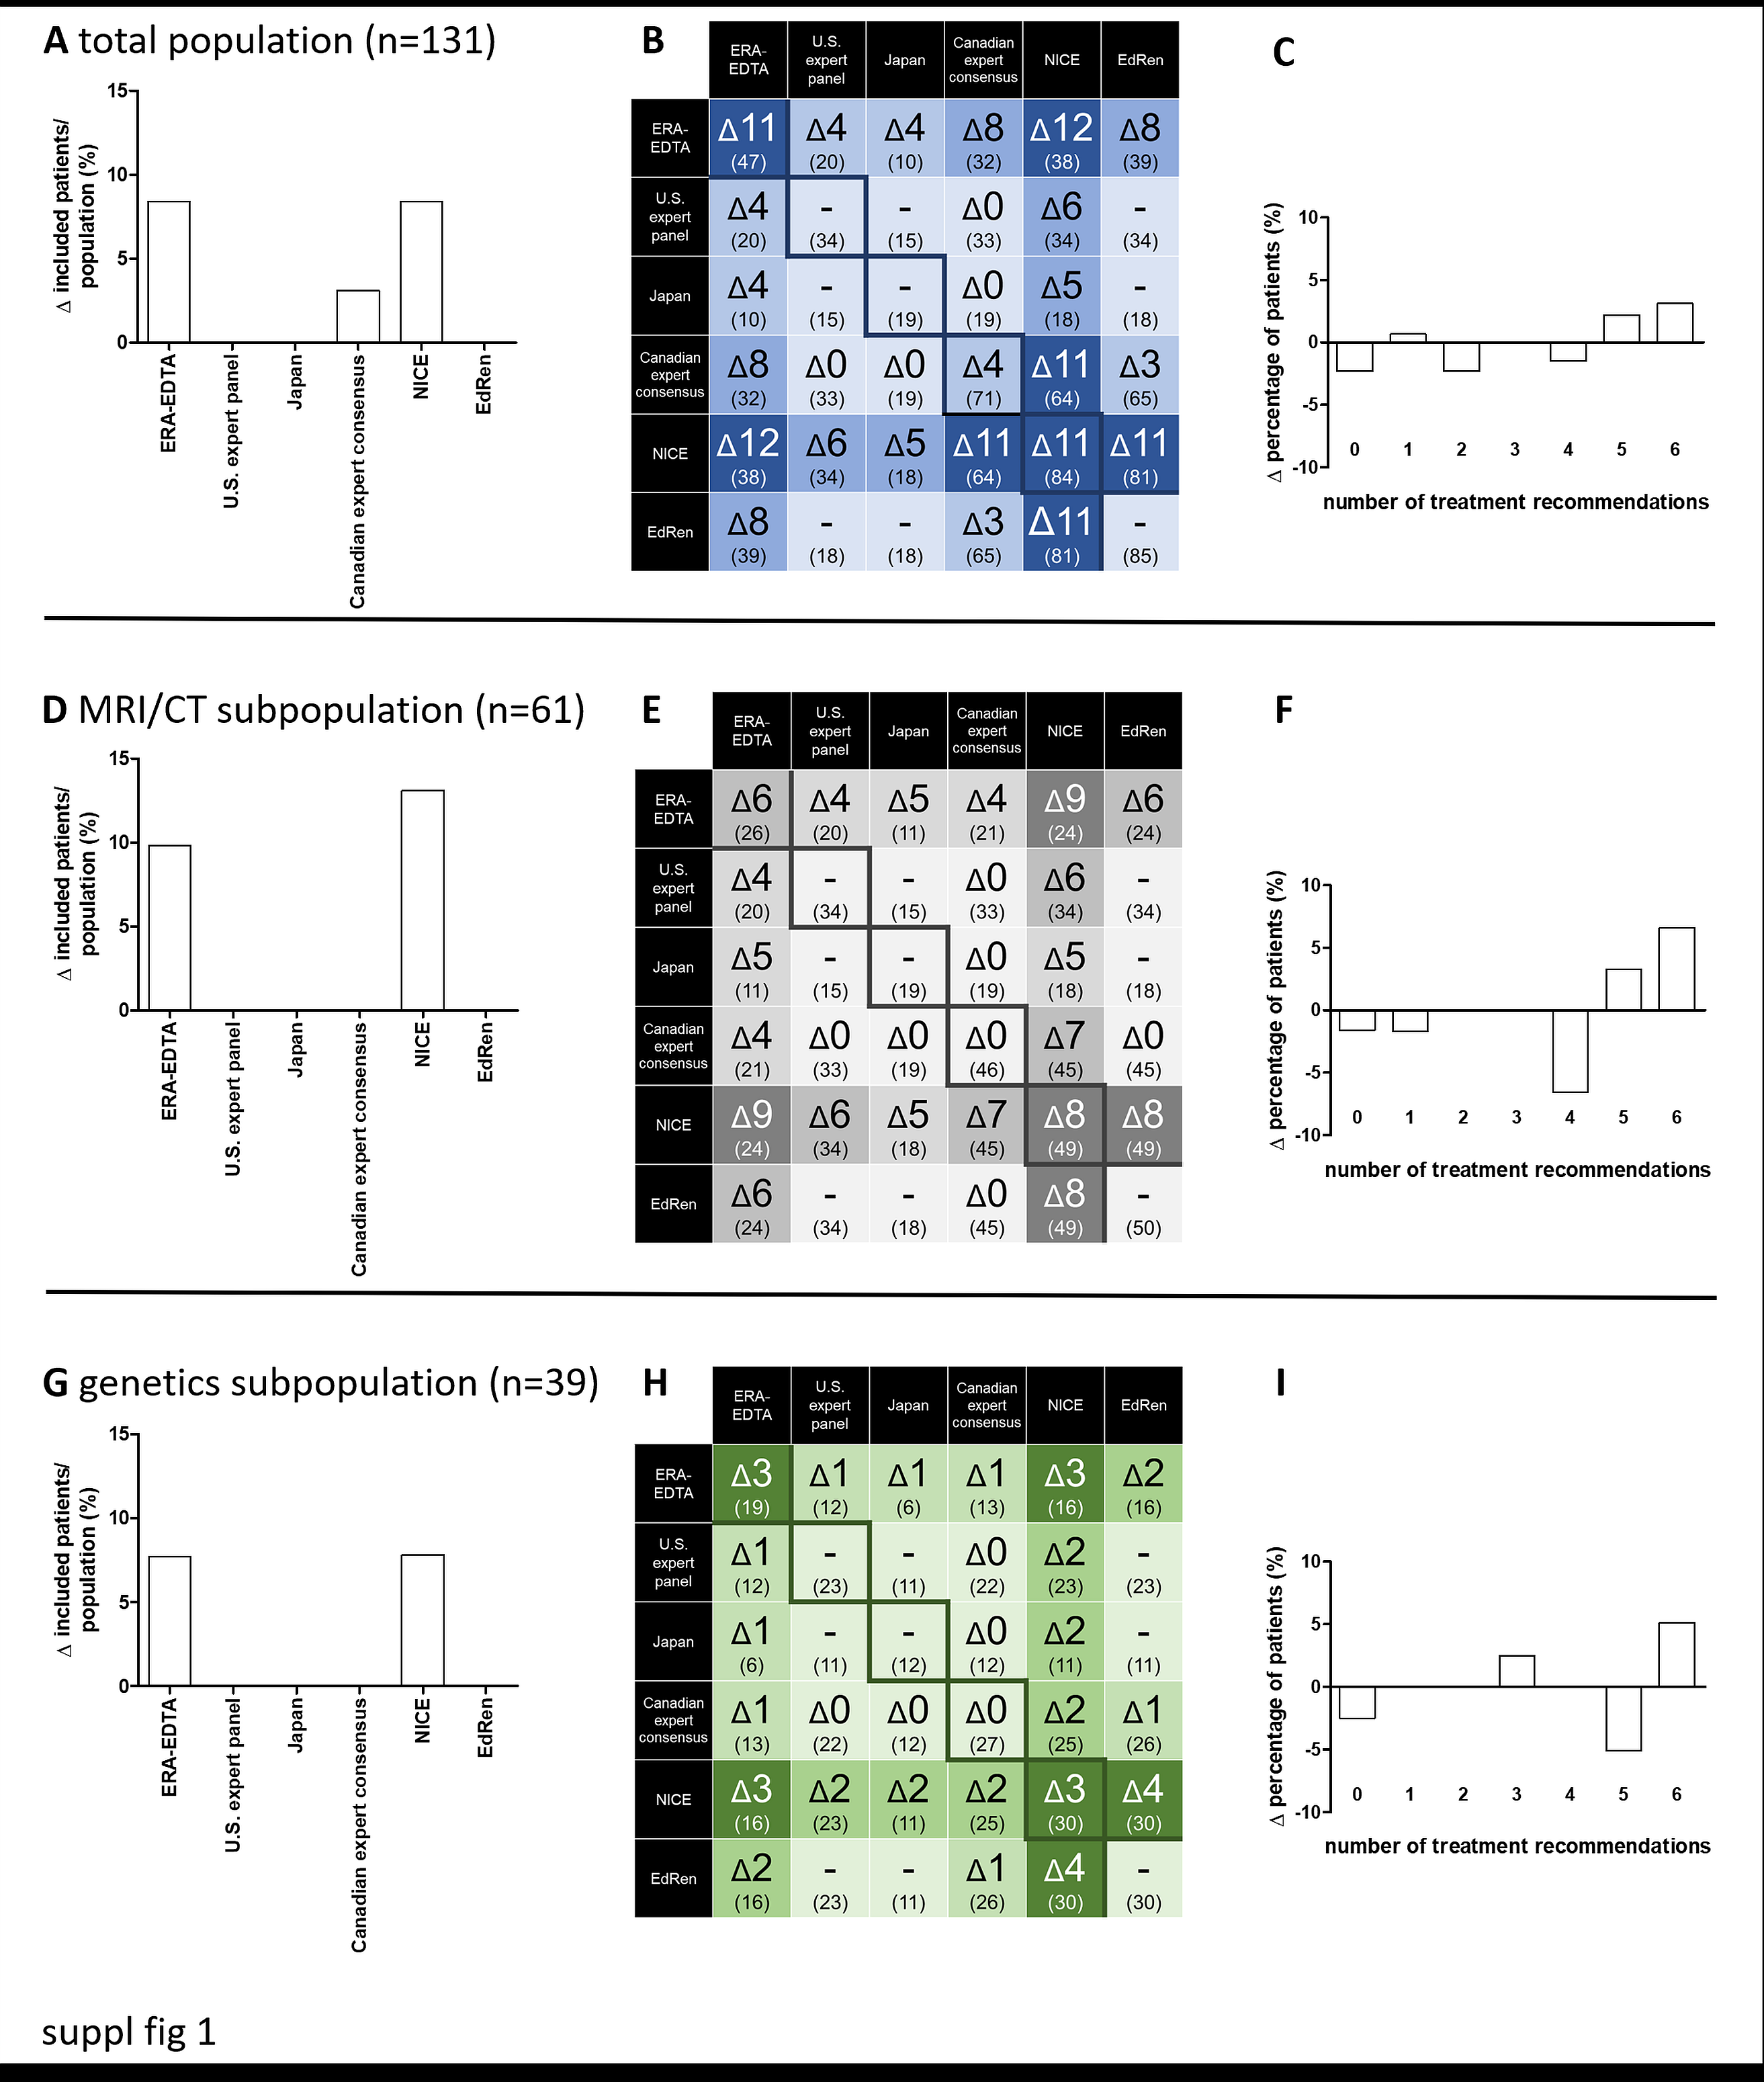

Supplement: Supplementary file 1 [file 1 › 502634_sm2.tif]
